1        **Temperature-driven selection on metabolic traits increases the**  
2                    **strength of an algal-grazer interaction in naturally warmed**  
3                    **streams**

4        **Authors**

5        C. -Elisa Schaum<sup>1,4\*</sup>, Bio244 Students<sup>1</sup>, Richard ffrench-Constant<sup>2</sup>, Chris Lowe<sup>1,2</sup>, Jón S.  
6        Ólafsson<sup>3</sup>, Daniel Padfield<sup>1</sup> & Gabriel Yvon-Durocher<sup>1\*</sup>

8        **Author affiliations**

9        1 Environment and Sustainability Institute, University of Exeter, Penryn, Cornwall TR10 9EZ, UK

10        2 Centre for Ecology and Conservation, College of Life and Environmental Sciences, University of Exeter,  
11        Penryn, Cornwall, TR10 9FE, U.K.

12        3. Marine and Freshwater Research Institute, Árleyni 22, 112 Reykjavik, Iceland.

13        4. Institute for Hydrobiology and Fisheries, Section Biological Oceanography, University of Hamburg,  
14        Hamburg, 22767, Germany

15        \* Corresponding authors: bav0352@uni-hamburg.de, [g.yvon-durocher@exeter.ac.uk](mailto:g.yvon-durocher@exeter.ac.uk),

16

17        **Author Contributions:**

18        GYD conceived the experiment. GYD and ES supervised the experiment, analysed data, and  
19        wrote the manuscript. All authors contributed to later versions of the manuscript.

20

21        **Data accessibility statement:** All data will be made available as supporting information  
22        should the manuscript be accepted. R-Code for analysis will be available from the authors on  
23        request.

24

25        **Type of Article:** Primary Research Article

26        This file includes the supporting information at the end of the file

27        **Number of words in: Abstract:** 220;

28        **Main Text without legends and references:** 5060

29        **Number of Figures:** 3

30        List: Figure 1: Map and experimental set-up. 2. Thermal reaction norms of grazer metabolic  
31        rates. 3. Long and short-term effects of elevated temperature on interaction strength and  
32        metabolic rates.

33        **Number of Tables:**2

34        List: 1. Physical and chemical characteristics of geothermal streams. 2. Parameter estimates  
35        and output of gnls models.

36        **Number of cited references:** 70

37        **Correspondence during submission to:** Elisa Schaum [bav0352@uni-hamburg.de](mailto:bav0352@uni-hamburg.de) or

38        Gabriel Yvon Durocher [g.yvon-durocher@exeter.ac.uk](mailto:g.yvon-durocher@exeter.ac.uk)

39

40

41

42 **ABSTRACT**

43 Trophic interactions are important determinants of the structure and functioning of  
44 ecosystems. As the metabolism and consumption rates of ectotherms increase sharply with  
45 temperature, there are major concerns that global warming will increase the strength of  
46 trophic interactions, destabilizing food webs, and altering ecosystem structure and function.  
47 We used geothermally warmed streams that span a  $\sim 10^\circ\text{C}$  temperature gradient to investigate  
48 the interplay between temperature-driven selection on traits related to metabolism and  
49 resource acquisition, and the interaction strength between the keystone gastropod grazer, the  
50 wandering snail *Radix balthica*, and a common algal resource. Populations from a warm  
51 stream ( $\sim 28^\circ\text{C}$ ) had higher maximal metabolic rates and optimal temperatures than their  
52 counterparts from a cold stream ( $\sim 17^\circ\text{C}$ ). We found that metabolic rates of the population  
53 originating from a warmer stream were higher across all measurement temperatures. A  
54 reciprocal transplant experiment demonstrated that the interaction strengths between the  
55 grazer and its algal resource were highest for both populations when transplanted into the  
56 warm stream. In line with the thermal dependence of respiration, interaction strengths of  
57 grazers from the warm stream were always higher than those of grazers from the cold stream.  
58 These findings suggest that warming can increase the strength of algal-grazer interactions  
59 through the thermodynamic effects of higher temperatures on physiological rates as well as  
60 through correlated increases in *per capita* metabolism and consumption.

61

62 **Keywords:** Consumer-resource interactions, global warming, metabolism, thermal  
63 adaptation, interaction strength

64

## 65 INTRODUCTION

66 The strength of consumer-resource interactions (e.g. the effect of a consumer on the  
67 population density of its prey) plays a critical role in shaping the stability of food webs (May,  
68 1973; Paine, 1980; McCann *et al.*, 1998; Otto *et al.*, 2007). Grazing is an important class of  
69 consumer-resource interaction, determining the flux of energy and materials from autotrophs  
70 to heterotrophs. There are currently major concerns that global warming will increase the  
71 impact of grazers on algal or plant communities because the ingestion and respiration rates of  
72 heterotrophs tend to be more sensitive to rising temperatures than rates of photosynthesis and  
73 growth in autotrophs (O'Connor, 2009; Gilbert *et al.*, 2014; West & Post, 2016). Stronger  
74 interactions have the potential to destabilise food webs and consequently, warming induced  
75 increases in interaction strengths could have fundamental implications for ecosystem  
76 structure and function. For example, elevated grazing rates in aquatic ecosystems, driven by  
77 the mismatch in thermal sensitivity between autotrophs and heterotrophs, are a key driver of  
78 projected declines in aquatic primary production over the 21<sup>st</sup> century in models of ocean  
79 biogeochemistry (Laufkötter *et al.*, 2015).

80 The effects of temperature on metabolic rates and traits associated with consumer-  
81 resource interactions (e.g. attack rates, handling times) often follow characteristic unimodal  
82 thermal response curves, in which rates increase exponentially to an optimum and decline  
83 rapidly thereafter (Dell *et al.*, 2011; Englund *et al.*, 2011; Rall *et al.*, 2012; Dell *et al.*, 2014;  
84 Gilbert *et al.*, 2014). Integrating thermal responses for metabolism and interaction-traits with  
85 dynamical models of consumer-resource interactions offers a promising framework for  
86 predicting food web responses to global warming (Vasseur & McCann, 2005; Shurin *et al.*,  
87 2012; Binzer *et al.*, 2015). However, thermal response curves are often flexible, and can shift  
88 when organisms are exposed to novel thermal environments, both via phenotypic plasticity  
89 and adaptive evolution (Angilletta *et al.*, 2003; Kingsolver *et al.*, 2004; Deutsch *et al.*, 2008;

90 Kingsolver & Huey, 2008). Consequently, plasticity and evolution have the potential to  
91 modulate the effects of rising temperatures on the strength of species interactions (Sentis *et*  
92 *al.*, 2015). For example, if metabolic rates are down-regulated after long-term exposure to  
93 higher temperatures (Addo-Bediako *et al.*, 2000), then compensatory metabolic responses to  
94 warming could mitigate predicted increases in consumer-resource interaction strength. How  
95 these long-term responses to warming affect rates of metabolism and in turn, the strength of  
96 consumer-resource interactions, are largely unknown, limiting our ability to predict how  
97 trophic interactions will change in response to warming in the long-term.

98         There is evidence from studies across naturally occurring thermal gradients over large  
99 spatial scales, that local thermal adaptation can play an important role in shaping the strength  
100 of species interactions (Barton, 2011; De Block *et al.*, 2012). While these studies provide  
101 important insights into how consumer-resource interactions are shaped by evolution across  
102 thermal gradients (Fukami & Wardle, 2005), their usefulness for understanding responses to  
103 rapid climate warming might be limited, because other factors, such as day length, light  
104 intensity and precipitation, tend to be confounded with temperature along such broad scale  
105 spatial gradients. Furthermore, the timescales over which local adaptation has occurred in  
106 such broad scale studies could be much longer than the rapid evolutionary change required to  
107 keep pace with climate warming (Loarie *et al.*, 2009; Hoffmann & Sgrò, 2011). Here, we  
108 investigate how temperature-driven selection on traits that determine the thermal responses of  
109 metabolism and resource acquisition affect the strength of a keystone grazing interaction (the  
110 gastropod *Radix balthica*, which grazes algal biofilms in streams) in naturally warmed  
111 Icelandic geothermal streams spanning a gradient of 11°C. Critically, temperature is the main  
112 abiotic factor that varies among streams in the catchment and is not correlated with pH,  
113 conductivity or inorganic nutrient concentrations (see Table 1). These streams are thought to  
114 have been subject to geothermal heating for at least the last century (OGorman *et al.*, 2012).

115 This system therefore provides the opportunity to investigate how long-term differences in  
116 temperature between otherwise similar sites shape the expression of metabolic traits and the  
117 subsequent impact of any temperature-driven selection on species interactions in a natural  
118 system. Specifically, we ask: can long-term differences in temperature drive selection for  
119 metabolic traits that attenuate the direct effects of warming on the strength of consumer-  
120 resource interactions?

## 121 122 **METHODS**

### 123 124 **Study site**

125 The streams are located North of the Hveragerði valley, in the south east of the Hengil high  
126 temperature geothermal field, Iceland (N64° 0' 2.944" W21° 11' 17.451") and consist of a  
127 catchment of 11 streams spanning a temperature gradient of approximately 20 °C (see Figure  
128 1 and SI Figure 1). Two streams, stream 5 (17.5 °C ± 4.5 °C, hereafter ‘cold stream’) and  
129 stream 11A (28.3 °C ± 1.3 °C, hereafter ‘warm stream’, see Table 1 for a comparison of other  
130 chemical and physical parameters), were chosen for experiments due to their close proximity  
131 to each other, the large temperature differential and similar abundances of the keystone  
132 grazer, *Radix balthica*. The grazer plays an important functional role in geothermal stream  
133 ecosystems, where grazer biomass as well as grazing rates are strongly influenced by  
134 temperature (OGorman *et al.*, 2012). The two streams are similar in all other measured  
135 physical and chemical characteristics but differ in average temperature by 11 °C (see Table  
136 1), and hence present an opportunity to investigate how the effects long-term differences in  
137 temperature shape consumer-resource interactions.

### 138 139 **Grazer metabolism**

140 To quantify whether the different thermal regimes in the two adjacent streams resulted in  
141 divergence in metabolic traits of *R. balthica* we measured the acute responses of respiration

142 to a broad gradient in temperature. We collected 33 individuals of similar weight and length  
143 from each stream, which were cleaned from any algal debris to avoid carry-over of a food  
144 source into the tank or subsequent respiratory measurements on the oxygen electrode. The  
145 snails were kept overnight in aerated tanks at the average stream temperature of origin and in  
146 the absence of a food source to minimise any potential effects of differences in food quantity  
147 or quality between streams. Respiration was quantified as the rate of oxygen consumption in  
148 a Clark-Type oxygen electrode, measured between 4 – 44 °C in 4 °C increments (11  
149 temperatures in total). At each temperature, respiration was measured for 3 individuals, and a  
150 different set of individuals was measured at each temperature (i.e. each animal was only  
151 subjected to a single assay). Individuals were allowed 15 minutes at the assay temperature  
152 prior to the measurements. The subsequent thermal responses of respiration were quantified  
153 using a modification of the Sharpe-Schoolfield equation (see (Schoolfield *et al.*, 1981) and  
154 (Sharpe & DeMichele, 1977) for the original equation):

$$155 \ln(b(T)) = E_a \left( \frac{1}{kT_c} - \frac{1}{kT} \right) + \ln(b(T_c)) + \alpha \ln(M_i) - \ln \left( 1 + e^{E_h \left( \frac{1}{kT_h} - \frac{1}{kT} \right)} \right) \quad (1)$$

156 where  $b(T)$ , is the *per capita* metabolic rate ( $\mu\text{mol O}_2 \text{ L}^{-1} \text{ h}^{-1}$ ) at temperature  $T$  in Kelvin (K),  
157  $k$  is Boltzmann's constant ( $8.62 \times 10^{-5} \text{ eV K}^{-1}$ ),  $E_a$  is an apparent activation energy (in eV) for  
158 the metabolic process,  $\ln(b(T_c))$  is the rate of metabolism normalised to an arbitrary  
159 reference temperature,  $T_c = 18 \text{ °C}$ , where no low or high temperature inactivation is  
160 experienced.  $M_i$  is the mass (g) of an individual  $i$ ,  $\alpha$  is the allometric scaling exponent that  
161 characterises the power-law relation of mass and metabolic rate (Brown *et al.*, 2004).  $E_h$   
162 characterizes temperature-induced inactivation of enzyme kinetics above  $T_h$  where half the  
163 enzymes are rendered non-functional. Differentiating equation (1) and solving for the global  
164 maxima yields an expression for the optimum temperature

$$165 T_{opt} = \frac{E_h T_h}{E_h + k T_h \ln \left( \frac{E_h}{E_a} - 1 \right)} \quad (2)$$

166 Equation (1) differs from the Sharpe-Schoolfield equation (Sharpe & DeMichele, 1977;  
167 Schoolfield *et al.*, 1981) in a number of ways. First, we account for the power law relation  
168 between body mass and metabolic rate,  $M^\alpha$  (Brown *et al.*, 2004). Second, we exclude  
169 parameters from Eq. (1) used to characterize low-temperature inactivation due to insufficient  
170 data to quantify this phenomenon in our analysis. Third, rather than characterize temperature  
171 effects below  $T_{\text{opt}}$  using the Eyring (1935) relation,  $\left(\frac{T}{T_c}\right) e^{E_a\left(\frac{1}{kT_c} - \frac{1}{kT}\right)}$ , we instead use the  
172 simpler Boltzmann factor,  $e^{E_a\left(\frac{1}{kT_c} - \frac{1}{kT}\right)}$ . This simplification enables an explicit solution for  $T_{\text{opt}}$   
173 (Eq. 2) and facilitates more direct comparison with previous work on the temperature  
174 dependence of metabolism using metabolic theory e.g. (Allen *et al.*, 2005, Gillooly, 2001;  
175 Brown *et al.*, 2004; Van M Savage *et al.*, 2015).

176 The parameters,  $\ln b(T_c)$ ,  $\alpha$ ,  $E_a$ ,  $E_h$ ,  $T_h$ , and  $T_{\text{opt}}$ , in Eqs. (1) & (2) represent traits  
177 characterising the metabolic thermal response that we expect to be under selection in *R.*  
178 *balthica* inhabiting the hot and cold streams. We tested for differences in each of the  
179 parameters between the populations of *R. balthica* by fitting the respiration data to Eq. (1)  
180 using generalised non-linear least squares regression (within the ‘gnls’ function in the ‘nlme’  
181 package for R, package version 3.1-128) and including ‘origin’ as a two level factor (i.e.  
182 ‘cold’ and ‘warm’ stream). We tested for differences between populations for each parameter  
183 by sequentially removing the effect of ‘origin’ on each parameter and comparing the Akaike  
184 information criterion for small sample sizes (AICc) for all possible models (see SI Table 1  
185 and SI Table 2) using the ‘aictab’ and ‘modavg’ functions from the AICcmodavg package  
186 (package version 2.1-0). The model chosen for further exploration was that with the lowest  
187 (AICc) value. Model averaging was carried out when models fell within 2 AICc units of each  
188 other, and the conditional averages of the parameters were used for curve fitting and  
189 interpretation (see also Table 2). The relative importance of the fixed factors in the averaged  
190 model was determined using the sum of their relative weights.

191

## 192 **Reciprocal transplant experiment**

193 We carried out a reciprocal transplant experiment to determine how long-term differences in  
194 temperature and the resultant impacts on metabolic traits affect the strength of algal-grazer  
195 interactions. We achieved this by placing snails from each population in microcosms  
196 consisting of a tissue culture flask on which diatom biofilms had been established. Diatoms  
197 of the genera, *Acnantes*, *Nitzschia*, *Navicula*, and *Gomphonema* are common in streams  
198 across the Hengill volcanic area (Gudmundsdottir *et al.* 2013) and were ordered from culture  
199 collections (Culture collection of algae and protozoa and Sciento) and grown in the  
200 laboratory in mixed assemblages to yield common resource for testing the effects of  
201 temperature and local adaptation on grazing. The diatom assemblages were inoculated into  
202 Corning plastic translucent flasks (maximum volume 1L) with 20 mL COMBO medium  
203 (Kilham *et al.*, 1998), and brought to a salinity of 5-10 (equivalent to approximately 5-10 g  
204 salts/kg water) to match the slightly elevated salinity and conductivity found in these thermal  
205 stream environments (Gudmundsdottir *et al.* 2013). The flasks were turned onto their sides to  
206 allow for a larger area of biofilm growth on the base (~ 60 cm<sup>2</sup> in total per flask) and the algal  
207 communities were left to grow for 14 days prior to the experiment. After 14 days, all flasks  
208 had substantial biofilm development on the base and were used as microcosms for the *in situ*  
209 reciprocal transplant experiment. Analysis of control flasks (no grazer) showed that growth of  
210 the diatom lawn *per se* did not differ significantly for flasks placed in hot or cold streams (SI  
211 Figure 2, one-way ANOVA  $F_{1,10} = 1.28$ ,  $P = 0.26$ ). Thus, any changes to the biofilm biomass  
212 in the experiment can be attributed to the per capita effects of the grazer.

213 The experiment consisted of 3 treatments (each with 6 replicate microcosms placed in  
214 each of the 2 streams): (i) a control microcosm in which a biofilm was present and no *R.*  
215 *balthica* were added, (ii) an ‘origin’ treatment in which *R. balthica* that were resident in the



216 stream were added to microcosms, and (iii) a ‘transplanted’ treatment in which *R. balthica*  
217 that were from the adjacent stream were added to microcosms. *R. balthica* individuals were  
218 collected from the 2 streams the day before the experiment and were starved for 24h in the  
219 laboratory in aerated tanks at the average temperature of the stream of origin. There was no  
220 significant difference in average snail weight between the two streams (see SI Figure 3, one-  
221 way ANOVA:  $F_{1,408} = 0.15$ ,  $P = 0.7$ ). Microcosms were assembled by adding 3 snails of  
222 similar body dimensions ( $0.35 \pm 0.03$  g of *R. balthica* weight reported as blotted fresh weight  
223 throughout) and 100 mL of 0.4  $\mu\text{m}$  filtered water from the stream in which the microcosm  
224 was to be placed. This resulted in a grazer density of 5 individuals  $\text{m}^{-2}$ , which was  
225 comparable to the average *in situ* density in the streams (see SI Figure 4, no significant  
226 difference in *in situ* density between the two-streams: one-way ANOVA:  $F_{1,66}$ ,  $P = 0.54$ ).  
227 This design was preferred to a set-up with each microcosm holding a single grazer, which  
228 attempt to exclude the effects of mutual interference on feeding behaviour e.g. (Skalski &  
229 Gilliam, 2001; Rall *et al.*, 2009; Lang *et al.*, 2011; Vucic-Pestic *et al.*, 2011), because (i) the  
230 experimental densities are representative of natural conditions; and (ii) the consumption rates  
231 of a single individual were insufficient to detect a significant change in algal biomass. The  
232 microcosms were submerged in each stream and the snails were left to graze for 48 hours.  
233 We observed no grazer mortality over the experimental period.

234

### 235 **Interaction strength**

236 At the end of the experiment, algal biomass in each of the microcosms was quantified via  
237 methanol chlorophyll extraction modified from (Holm-Hansen & Riemann, 1978). Here, the  
238 walls of the microcosms were scrubbed until all biofilm particles were in suspension. The  
239 solution was filtered onto a 0.4 $\mu\text{m}$  GF/F filter, which was then ground in methanol for 5  
240 minutes. The samples were centrifuged at 3500 rpm for 15 minutes and the absorbance of the

241 supernatant was measured at 632nm, 665nm, and 750nm. Total chlorophyll content in  $\mu\text{g}$   
242  $\text{mL}^{-1}$  was then calculated as described in Holm-Hansen & Riemann (1978). The *per capita*  
243 interaction strength in each microcosm was then estimated by calculating the dynamic index  
244 (DI, see also (Berlow *et al.*, 2004) for a technically similar set-up):

$$245 \quad DI = \frac{\ln\left(\frac{N}{D}\right)}{Yt} \quad (3)$$

246 where DI is the dynamic index ( $\text{g C}^{-1} \text{h}^{-1}$ ),  $N$  is total chlorophyll (sum of Chl  $a$  + Chl  $c$ )  
247 content of control,  $D$  total chlorophyll in the grazed microcosm,  $Y$  is the grazer biomass ( $\text{g}$   
248  $\text{C}$ ), and  $t$  is time in hours. Snail blotted wet weight was converted to carbon mass (in grams)  
249 using conversion factors that assume dry weight to be 7.5% of the blotted wet weight  
250 (Ricciardi & Bourget, 1998) and a carbon content of 22% dry weight (Burgmer *et al.*, 2010).

251 We carried out two analyses using the data from the reciprocal transplant experiment.  
252 The first analysis, used a generalised linear model (GLM), with ‘interaction strength’ as the  
253 response variable and ‘origin’ (‘cold’ or ‘warm’ stream) and ‘transplant temperature’ (17.5  
254 and 28.3 °C) as potentially interacting factors. We used this analysis to determine (i) whether  
255 interaction strengths differed between snails that originated from the warm or cold streams  
256 (e.g. a main effect of ‘origin’); (ii) whether interaction strengths were temperature dependent  
257 (e.g. a main effect of ‘temperature’); and (iii) whether the temperature dependence of  
258 interaction strength differed between the snails from the cold and warm streams (e.g.  
259 interaction between ‘origin’ and ‘temperature’).

260 The design of the reciprocal transplant experiment also enabled us to disentangle  
261 short-term temperature responses attributable to acclimation (e.g. responses to the  
262 temperature in the ‘transplanted’ stream) from those reflecting processes operating over  
263 longer, time scales (e.g. adaptation to the stream of ‘origin’). Note that these ‘long-term’  
264 effects, which we call ‘adaptation’, could reflect strict genetic microevolution (e.g. resulting  
265 in divergent genotypes among populations) or they could represent non-genetic effects of the

266 different temperature regimes that manifest over ontogenetic development, but are  
267 nevertheless adaptive (Bonduriansky *et al.*, 2011). In the second GLM we included  
268 ‘interaction strength’ as the response variable and ‘timescale’ (‘short’ or ‘long’) and  
269 ‘transplant temperature’ (17.5 and 28.3 °C) as potentially interacting factors. Here, ‘short-  
270 term’ temperature responses were characterised as the change in interaction strength between  
271 the stream of origin and the transplant stream. By contrast, the ‘long-term’ temperature  
272 response was characterised as the change in interaction strength comparing measurements  
273 made only when the snails were in their stream of origin. For better comparison of the  
274 steepness of the respiration reaction norms, we re-express the transplant temperature data as  
275 Boltzmann temperatures  $\left(\frac{1}{kT_c} - \frac{1}{kT}\right)$  so that the coefficients of the model yield activation  
276 energies in units of eV (see Eq. (1)). In this analysis, a significant interaction between  
277 ‘transplant temperature’ and ‘timescale’ would demonstrate that the temperature dependence  
278 of interaction strength differs between the ‘short-term’ ( $E_{\text{short}}$ , change in interaction strength  
279 between the stream of origin and the transplant stream, see also Fig. 3), and ‘long-term’  
280 ( $E_{\text{long}}$ , i.e. change in interaction strength comparing measurements made only when the snails  
281 were in their stream of origin, see also Fig. 3). We assume that  $E_{\text{short}}$  captures rapid  
282 physiological plasticity (e.g. acclimation) in interaction strength in response to a change in  
283 temperature and  $E_{\text{long}}$  captures processes operating over longer timescales – e.g. genetic  
284 microevolution and non-genetic developmental effects. Consequently, the component of the  
285 temperature sensitivity attributable to ‘adaptation’ (recognising that this might be genetically  
286 and/or developmentally determined) is given by  $E_{\text{adapt}} = E_{\text{long}} - E_{\text{short}}$ .

287

## 288 **RESULTS**

### 289 **Metabolic thermal response curves**

290 The allometric scaling coefficient,  $\alpha$ , and the apparent activation energy,  $E_a$ , were consistent  
291 between the populations of *R. balthica* from the cold and warm streams (see Table 2 for  
292 model comparison and estimated parameter values). The temperature normalised rate of  
293 respiration,  $\ln b(T_c)$ , and  $T_h$  (the temperature at which respiration was 50% inactivated) were  
294 both higher in the population of *R. balthica* from the warm stream. Because the optimum  
295 temperature,  $T_{opt}$ , depends strongly on  $T_h$  (see Eq. (2)),  $T_{opt}$  was higher in *R. balthica* from  
296 the warmer stream ( $T_{opt}$  warm =  $38.25 \pm 0.6$  °C;  $T_{opt}$  cold =  $33.05 \pm 1.5$  °C). As  $\ln b(T_c)$  and  
297  $T_{opt}$  were both higher, the warm populations of *R. balthica* had elevated metabolic rates  
298 across the full range of measurement temperatures (Fig. 2).

299

### 300 **Local adaptation of interaction strength**

301 Interaction strength increased with elevated transplant temperature for the populations of *R.*  
302 *balthica* from both the warm and the cold streams (Fig. 3A; main effect of ‘transplant  
303 temperature’ GLM  $t_{1,21} = 2.56$ ;  $P < 0.01$ ). Furthermore, interaction strengths were  
304 consistently higher for the populations of *R. balthica* from the warm stream in both transplant  
305 temperatures (Fig. 3A; GLM main effect of ‘origin’  $t_{1,121} = 2.92$ ;  $P < 0.005$ ). These findings  
306 are consistent with the higher respiration rates observed in the warm population (Fig. 2) and  
307 highlight the association between metabolism and interaction strength.

308

### 309 **Disentangling the short- and long-term effects of warming on interaction strengths**

310 Our experimental design enabled us to compare temperature sensitivities that capture short-  
311 term thermal acclimation (e.g. changes in interaction strength in response to the reciprocal  
312 transplant) as well as the long-term temperature sensitivity, which also includes effects of  
313 local adaptation (e.g. changes in rates between warm and cold populations quantified in the  
314 stream of origin). We found that interaction strength increased with temperature in both the

315 short- and the long-term (Fig. 3). However, the magnitude of the temperature response was  
316 significantly larger in the long-term (Fig. 3; interaction between ‘transplant temperature’ and  
317 ‘timescale’ on interaction strength;  $GLM_{1,18} = -2.91$ ;  $p < 0.05$ ), where, the average  $E_{\text{short}}$  was  
318 0.46 eV, while  $E_{\text{long}}$  was significantly higher at 0.99 eV. This divergence between the short-  
319 and long-term temperature sensitivities implies a non-trivial contribution of adaptation in  
320 amplifying the effects of temperature on interaction strength *in situ*, with the contribution of  
321  $E_{\text{adapt}}$  of 0.51 and 0.53 eV in the cold and warm adapted populations respectively.

322

## 323 **DISCUSSION**

324 Understanding how global warming will affect the strength of consumer-resource interactions  
325 and the stability of aquatic food webs is a fundamental challenge in evolutionary ecology that  
326 requires insight on the short-term effects of temperature on metabolism and interaction traits  
327 and they are modulated by evolutionary and developmental processes over longer time scales.  
328 There is evidence from terrestrial (Rall *et al.*, 2009; Barton, 2011; Vucic-Pestic *et al.*, 2011;  
329 Brose *et al.*, 2012), freshwater (Kratina *et al.*, 2012) and marine ecosystems (Sanford, 1999),  
330 that warming is likely to increase the strength of consumer-resource interactions, at least in  
331 the short-term, owing to the exponential effects of temperature on the consumption rates of  
332 mobile ectothermic consumers (Dell *et al.*, 2014; Gilbert *et al.*, 2014). What is less clear  
333 however, is how long-term responses to rising temperatures will modulate the direct effects  
334 of warming on species interactions. Space-for-time substitutions across broad spatial scales  
335 indicate that local adaptation to different thermal regimes can play an important role in  
336 shaping species interactions, often compensating for the direct effects of temperature on  
337 interaction traits (Barton, 2011; De Block *et al.*, 2012). Here, we build on this work by  
338 investigating the effects of temperature and local adaptation on the interaction between the  
339 gastropod grazer, *R. balthica*, and its algal resource. Our study contributes novel insights in a

340 number of ways. First, we explore patterns of local adaptation over a relatively small spatial  
341 scale (m as opposed to km). The two streams in our experiment are separated by  
342 approximately 500 m but differ in temperature by 11 °C. Because dispersal, gene flow and  
343 genetic divergence among populations in this species are strongly related to geographic  
344 distance (Johansson *et al.*, 2016), our study over a relatively small spatial scale, provides  
345 insight into how metabolic and resource acquisition traits in closely related natural  
346 populations have diverged in response to warming and is therefore directly relevant for  
347 understanding the effects of rapid climate change (Richter-Boix *et al.*, 2010; Keller *et al.*,  
348 2013; Merilä & Hendry, 2014). Second, we quantified the effects of temperature on both  
349 metabolic and consumption rates to determine how temperature-driven selection on key traits  
350 shape the effects of long-term warming on the strength of consumer-resource interactions.

351 We found significant variation in the thermal response curves for respiration between  
352 the populations of *R. balthica* from the warm and cold streams. The optimum temperature  
353 ( $T_{opt}$ ) for respiration was higher in the warm population (i.e. metabolic rates peaked at higher  
354 temperatures). Furthermore, the inactivation energy ( $E_h$ ) was lower in the warm population,  
355 indicating that declines in the rate of respiration after the optimum (i.e. at high temperatures)  
356 were less pronounced than in grazers from the cold stream, where metabolic rates peaked at  
357 lower temperatures and declined markedly at temperatures above  $T_{opt}$ . These divergences  
358 indicate that the different thermal regimes in these streams have selected for different  
359 metabolic traits in warm and cold populations of *R. balthica*. Whilst the higher  $T_{opt}$  and lower  
360  $E_h$  in the warm population were in line with expectations assuming local thermal adaptation,  
361 we found no evidence that metabolic performance at high temperature was traded-off against  
362 performance at low temperature. Instead, metabolic rates were higher for *R. balthica* from the  
363 warm stream across all measurement temperatures. These results are in broad agreement with  
364 the “hotter is better” hypothesis, which proposes that maximal performance of organisms

365 with higher optimal temperatures should be greater than those with lower optimum  
366 temperatures because of the thermodynamic constraints imposed by high temperatures on  
367 enzyme kinetics (Huey & Kingsolver, 1993; Kingsolver *et al.*, 2004; Angilletta *et al.*, 2010).  
368 Indeed maximal respiration rates in the population from the warm stream were greater than  
369 those from the cool (ln(R) warm stream:  $3.39 \pm 0.14 \mu\text{mol O}_2 \text{ L}^{-1} \text{ h}^{-1}$ , and cool stream:  $2.54 \pm$   
370  $0.26 \mu\text{mol O}_2 \text{ L}^{-1} \text{ h}^{-1}$ , both  $\pm 1$ .s.e.m.). The lower  $E_h$ , (i.e. the steepness of the decline of the  
371 thermal reaction norm past the optimum), and higher  $\ln b(T_c)$ , i.e. the rate of respiration  
372 normalised to 18 °C, in the warm population also meant that the thermal response curve for *R.*  
373 *balthica* from the warm stream was broader. In agreement with previous work (e.g. on  
374 bacteriophages, (Knies *et al.*, 2009), our data for the gastropod *R. balthica* indicate that  
375 adaptation to higher temperatures resulted in both greater maximal metabolic performance  
376 and a broader metabolic thermal reaction norm.

377         The general patterns observed in the metabolic traits were also reflected in the effects  
378 of temperature on interaction strength. Interaction strength was higher for individuals placed  
379 in the warm stream, irrespective of their stream of origin. These findings suggest that  
380 elevated temperatures increase consumption rates though the effects of temperature on  
381 respiratory physiology, but local adaptation to warmer environments also results in a  
382 correlated increase in metabolism and interaction strength at low temperature. This may have  
383 important wider implications for the effects of warming on the structure, functioning and  
384 stability of aquatic food webs (Rall *et al.*, 2009; O'Connor *et al.*, 2011; Vucic-Pestic *et al.*,  
385 2011; Dell *et al.*, 2014; Fussmann *et al.*, 2014; Gilbert *et al.*, 2014). If long-term responses to  
386 increasing temperature give rise to higher maximal rates of metabolism and consumption as  
387 well as elevating rates at lower temperatures, then the effects of warming on the strength of  
388 consumer-resource interactions in the long-term could be greater than previously anticipated  
389 (Gilbert *et al.*, 2014). Indeed, work on experimental warming of aquatic ecosystems has

390 shown that increases in the strength of top-down control can have profound effects on  
391 community structure and ecosystem processes (Burgmer & Hillebrand, 2011; Kratina *et al.*,  
392 2012; Yvon-Durocher *et al.*, 2015). Elevated grazing rates at warmer temperatures can have a  
393 wide range of impacts in aquatic systems, with evidence for both increases (Yvon-Durocher  
394 *et al.*, 2015) and decreases (Burgmer & Hillebrand, 2011) in algal species richness, biomass  
395 and productivity.

396 In our experiments, the thermal sensitivities of metabolic rates were much larger than  
397 those of interaction strengths in the short-term (e.g. 0.96 and 0.45 eV respectively), in line  
398 with findings in other invertebrate systems (Rall *et al.*, 2009; Vucic-Pestic *et al.*, 2011;  
399 Fussmann *et al.*, 2014). These findings suggest that rates of grazing and metabolism were  
400 clearly linked, but became decoupled when individuals experience rapid changes in  
401 temperature that depart substantially from those in their local environment. In the short-term,  
402 if increases in metabolic demands with temperature are greater than those of consumption  
403 rates (as found here), then less energy will be transferred from the resource to the consumer,  
404 i.e. more is lost through respiration, see also (Rall *et al.*, 2009). If such imbalances are  
405 maintained over long periods of time then starvation of the consumer can ultimately result in  
406 a decline in top-down control on the resource (Fussmann *et al.*, 2014; Binzer *et al.*, 2015).  
407 However, when consumers' feeding rates are more sensitive to temperature than metabolic  
408 rates, interaction strengths can become amplified in warmer environments, leading to faster  
409 resource depletion and eventually driving either the resource or the consumer to extinction  
410 (Vasseur & McCann, 2005). Long-term effects of temperature on interaction strengths have  
411 so far only been explored using food web models, parameterised using temperature  
412 sensitivities derived from short-term experiments (Vasseur & McCann, 2005; Rall *et al.*,  
413 2012; Fussmann *et al.*, 2014). Consequently, such analyses don't capture the evolutionary  
414 and developmental effects which can modulate the short-term effects of temperature on *per*



415 *capita* rates. Our results highlight substantial differences between the short- and long-term  
416 effects of temperature on interaction strength; implying that longer term processes plays an  
417 important role in maintaining the balance between metabolic and consumption rates.

418         We quantified the short- and long-term effects of temperature in the reciprocal  
419 transplant experiment. The short-term temperature response ( $E_{\text{short}}$ ) captures the effects of  
420 physiological plasticity over the 48h experiment. Conversely, the long-term response ( $E_{\text{long}}$ )  
421 also accounts for processes operating over longer timescales, including genetic micro  
422 evolution and non-genetic developmental effects of temperature. In our experiment,  $E_{\text{long}}$  was  
423 higher than  $E_{\text{short}}$ , implying a significant role for long-term processes in shaping the effects of  
424 temperature on *in situ* interaction strengths. Notably, the higher  $E_{\text{long}}$  was driven both by  
425 elevated grazing rates in the warm populations in the warm stream and lower rates in the cold  
426 populations in the cold stream. These results diverge from our expectations based on the  
427 metabolic cold adaptation hypothesis (Addo-Bediako *et al.*, 2000) which would predict  
428 populations from warmer environments should dampen the acute effects of temperature on  
429 metabolic rates. On the contrary, our results suggest that adaptation to warming amplified the  
430 effects of temperature on metabolic as well as grazing rates. The lower interaction strengths  
431 in the population of *R. balthica* from the colder stream highlight unexpected long-term  
432 effects of temperature on species interactions. Maintenance of lower than anticipated grazing  
433 rates in the cold stream could be selected for since lower grazing rates might result in greater  
434 food chain stability and/or stoichiometric homeostasis (Cross *et al.*, 2005; 2014) under the  
435 prevailing temperature regime. Thus, understanding the impacts of environmental change on  
436 the strength of consumer-resource interactions over timescales that are relevant to the rate of  
437 climate change (e.g. gradual warming over decades) will require an appreciation both of the  
438 direct effects of rising temperatures on species interactions and the reciprocal feedback  
439 between ecological and evolutionary dynamics (Fussmann *et al.*, 2007; Gravel *et al.*, 2010;

440 Loeuille, 2010; Urban, 2013; Barraclough, 2015)

441

## 442 **Conclusions**

443 We used a natural geothermal temperature gradient to investigate how warming influences  
444 the strength of algal-grazer interactions via the direct effects of temperature on metabolism  
445 and consumption, and indirect feedbacks through adaptation. Metabolic rates and interaction  
446 strength increased with temperature in the same way for both the warm and cold populations  
447 of *R. balthica*, suggesting that rapid changes in temperature have a consistent effect on  
448 interactions between mobile consumers and sessile resources, mediated by the effects of  
449 temperature on consumer metabolic rates (Dell *et al.*, 2014). However, the warm populations  
450 had higher metabolic and grazing rates across all measurement temperatures compared to  
451 their colder counterparts. These findings are consistent with the ‘hotter is better and broader’  
452 hypothesis (Huey & Kingsolver, 1993; Knies *et al.*, 2009; Angilletta *et al.*, 2010) (e.g.  
453 adaptation to warming gives rise to higher maximal metabolic rates and broader thermal  
454 reaction norms). In consequence, our results suggest that warming could increase the strength  
455 of algal-grazer interactions, which are often ‘keystone’ interactions in aquatic systems, both  
456 via the thermodynamic effects of higher temperatures on enzyme kinetics and through  
457 correlated increases in *per capita* metabolism and consumption as organisms adapt to warmer  
458 temperatures.

459

## 460 **Conflict of interest**

461 The authors declare no conflict of interest

462

## 463 **Acknowledgments**

464 The authors thank Eoin O’Gorman and for comments on an earlier version of this manuscript.

465 This study was funded by a Leverhulme Trust research grant (RPG-2013-335), and an ERC

466 starting grant (ERC-StG 677278) awarded to GYD; and the University of Exeter.

467

## 468 **References**

- 469 Addo-Bediako A, Chown SL, Gaston KJ (2000) Thermal tolerance, climatic variability, and  
470 latitude. *Proceedings of the Royal Society B: Biological Sciences*, **267**, 739–745.
- 471 Allen, A. P., J. F. Gillooly, and J. H. Brown. 2005. Linking the global carbon cycle to  
472 individual metabolism. *Functional Ecology* 19:202–213.
- 473 Angilletta MJ Jr, Huey RB, Frazier MR (2010) Thermodynamic Effects on Organismal  
474 Performance: Is Hotter Better? *Physiological and Biochemical Zoology*, **83**, 197–206.
- 475 Angilletta MJ Jr, Wilson RS, Navas CA, James RS (2003) Tradeoffs and the evolution of  
476 thermal reaction norms. *Trends in Ecology & Evolution*, **18**, 234–240.
- 477 Barraclough TG (2015) How Do Species Interactions Affect Evolutionary Dynamics Across  
478 Whole Communities? *Annual Review of Ecology, Evolution, and Systematics*, **46**, 25–48.
- 479 Barton BT (2011) Local adaptation to temperature conserves top-down control in a grassland  
480 food web. *Proceedings of the Royal Society B: Biological Sciences*, **278**, 3102–3107.
- 481 Berlow EL, Neutel AM, Cohen JE et al. (2004) Interaction strengths in food webs: issues and  
482 opportunities. *Journal of Animal Ecology*, **73**, 585–598.
- 483 Binzer A, Guill C, Rall BC, Brose U (2015) Interactive effects of warming, eutrophication  
484 and size structure: impacts on biodiversity and food-web structure. *Global Change  
485 Biology*, **22**, 220–227.
- 486 Bonduriansky R, Crean AJ, Day T (2011) The implications of nongenetic inheritance for  
487 evolution in changing environments. *Evolutionary Applications*, **5**, 192–201.
- 488 Brose U, Dunne JA, Montoya JM, Petchey OL, Schneider FD, Jacob U (2012) Climate  
489 change in size-structured ecosystems. *Philosophical Transactions of the Royal Society B:  
490 Biological Sciences*, **367**, 2903–2912.
- 491 Brown JH, Gillooly JF, Allen AP, Van M Savage, West GB (2004) Toward A Metabolic  
492 Theory Of Ecology. *Ecology*, **85**, 1771–1789.
- 493 Burgmer T, Hillebrand H (2011) Temperature mean and variance alter phytoplankton  
494 biomass and biodiversity in a long-term microcosm experiment. *Oikos*, **120**, 922–933.
- 495 Burgmer T, Reiss J, Wickham SA, Hillebrand H (2010) Effects of snail grazers and light on  
496 the benthic microbial food web in periphyton communities. *Aquatic Microbial Ecology*,  
497 **61**, 163–178.
- 498 Cross WF, Benstead JP, Frost PC, Thomas SA (2005) Ecological stoichiometry in freshwater  
499 benthic systems: recent progress and perspectives. *Freshwater Biology*, **50**, 1895–1912.
- 500 Cross WF, Hood JM, Benstead JP, Huryn AD, Nelson D (2014) Interactions between  
501 temperature and nutrients across levels of ecological organization. *Global Change  
502 Biology*, **21**, 1025–1040.
- 503 De Block M, Pauwels K, Van Den Broeck M, De Meester L, Stoks R (2012) Local genetic  
504 adaptation generates latitude-specific effects of warming on predator-prey interactions.  
505 *Global Change Biology*, **19**, 689–696.
- 506 Dell AI, Pawar S, Savage VM (2014) Temperature dependence of trophic interactions are  
507 driven by asymmetry of species responses and foraging strategy. *J Anim Ecol*, **83**, 70–84.
- 508 Dell AI, Pawar S, Savage VM (2011) Systematic variation in the temperature dependence of  
509 physiological and ecological traits. *Proceedings of the National Academy of Sciences*,

- 510 **108**, 10591–10596.
- 511 Deutsch CA, Tewksbury JJ, Huey RB, Sheldon KS, Ghalambor CK, Haak DC, Martin PR  
512 (2008) Impacts of climate warming on terrestrial ectotherms across latitude. *Proceedings*  
513 *of the National Academy of Sciences*, **105**, 6668–6672.
- 514 Englund G, Öhlund G, Hein CL, Diehl S (2011) Temperature dependence of the functional  
515 response. *Ecology Letters*, **14**, 914–921.
- 516 Fukami T, Wardle DA (2005) Long-term ecological dynamics: reciprocal insights from  
517 natural and anthropogenic gradients. *Proceedings of the Royal Society B: Biological*  
518 *Sciences*, **272**, 2105–2115.
- 519 Fussmann GF, Loreau M, Abrams PA (2007) Eco-evolutionary dynamics of communities  
520 and ecosystems. *Functional Ecology*, **21**, 465–477.
- 521 Fussmann KE, Schwarzmüller F, Brose U, Jousset A, Rall BC (2014) Ecological stability in  
522 response to warming. *Nature Climate Change*, **4**, 206–210.
- 523 Gilbert B, Tunney TD, McCann KS et al. (2014) A bioenergetic framework for the  
524 temperature dependence of trophic interactions (ed Wootton T). *Ecology Letters*, **17**,  
525 902–914.
- 526 Gillooly JF (2001) Effects of Size and Temperature on Metabolic Rate. *Science*, **293**, 2248–  
527 2251.
- 528 Gravel D, Bell T, Barbera C, Bouvier T, Pommier T, Venail P, Mouquet N (2010)  
529 Experimental niche evolution alters the strength of the diversity-productivity  
530 relationship. *Nature*, **469**, 89–92.
- 531 Gudmundsdottir, R., S. Palsson, E. R. Hannesdottir, J. S. Olafsson, G. M. Gislason, and B.  
532 Moss. 2013. Diatoms as indicators: The influences of experimental nitrogen enrichment  
533 on diatom assemblages in sub-Arctic streams. *Ecological Indicators* 32:74–81.
- 534 Hoffmann AA, Sgrò CM (2011) Climate change and evolutionary adaptation. *Nature*, **470**,  
535 479–485.
- 536 Holm-Hansen O, Riemann B (1978) Chlorophyll a Determination: Improvements in  
537 Methodology. *Oikos*, **30**, 438.
- 538 Huey RB, Kingsolver JG (1993) Evolution of Resistance to High Temperature in Ectotherms.  
539 *The American Naturalist*, **142**, S21–S46.
- 540 Johansson MP, Quintela M, Laurila A (2016) Genetic divergence and isolation by thermal  
541 environment in geothermal populations of an aquatic invertebrate. *Journal of*  
542 *Evolutionary Biology*, **29(9)**:1701-12
- 543 Keller I, Alexander JM, Holderegger R, Edwards PJ (2013) Widespread phenotypic and  
544 genetic divergence along altitudinal gradients in animals. *Journal of Evolutionary*  
545 *Biology*, **26**, 2527–2543.
- 546 Kilham SS, Kreeger DA, Lynn SG, Goulden CE, Herrera L (1998) COMBO: a defined  
547 freshwater culture medium for algae and zooplankton. *Hydrobiologia*, **377**, 147–159.
- 548 Kingsolver JG, Huey RB (2008) Size, temperature, and fitness: three rules. *Evolutionary*  
549 *Ecology Research*, **10**, 251–268.
- 550 Kingsolver JG, Ragland GJ, Shlichta JG (2004) Quantitative genetics of continuous reaction  
551 norms: thermal sensitivity of caterpillar growth rates. *Evolution*.
- 552 Knies JL, Kingsolver JG, Burch CL (2009) Hotter Is Better and Broader: Thermal Sensitivity  
553 of Fitness in a Population of Bacteriophages. *The American Naturalist*, **173**, 419–430.
- 554 Kratina P, Greig HS, Thompson PL (2012) Warming modifies trophic cascades and  
555 eutrophication in experimental freshwater communities. *Ecology*, **93**, 1421–1430.
- 556 Lang B, Rall BC, Brose U (2011) Warming effects on consumption and intraspecific  
557 interference competition depend on predator metabolism. *Journal of Animal Ecology*, **81**,  
558 516–523.
- 559 Laufkötter C, Vogt M, Gruber N et al. (2015) Drivers and uncertainties of future global

- 560 marine primary production in marine ecosystem models. *Biogeosciences*, **12**, 6955–6984.
- 561 Loarie SR, Duffy PB, Hamilton H, Asner GP, Field CB, Ackerly DD (2009) The velocity of  
562 climate change. *Nature*, **462**, 1052–1055.
- 563 Loeuille N (2010) Influence of evolution on the stability of ecological communities. *Ecology*  
564 *Letters*, **13**, 1536–1545.
- 565 May RM (1973) Qualitative stability in model ecosystems. *Ecology*, **54**, 638–641.
- 566 McCann K, Hastings A, Huxel GR (1998) Weak trophic interactions and the balance of  
567 nature. *Nature*, **395**, 794–798.
- 568 Merilä J, Hendry AP (2014) Climate change, adaptation, and phenotypic plasticity: the  
569 problem and the evidence. *Evolutionary Applications*, **7**, 1–14.
- 570 O'Connor MI (2009) Warming strengthens an herbivore–plant interaction. *Ecology*, **90**, 388–  
571 398.
- 572 O'Connor MI, Gilbert B, Brown CJ (2011) Theoretical predictions for how temperature  
573 affects the dynamics of interacting herbivores and plants. *The American Naturalist*, **178**,  
574 626–638.
- 575 OGorman EJ, Pichler DE, Adams G et al. (2012) *Impacts of Warming on the Structure and*  
576 *Functioning of Aquatic Communities: Individual- to Ecosystem-Level Responses*, 1st edn,  
577 Vol. 47. Elsevier Ltd., 96 p.
- 578 Otto SB, Rall BC, BROSE U (2007) Allometric degree distributions facilitate food-web  
579 stability. *Nature*, **450**, 1226–1229.
- 580 Paine RT (1980) Food webs: linkage, interaction strength and community infrastructure.  
581 *Journal of Animal Ecology*, **49**, 666.
- 582 Vucic-Pestic O, Ehnes RB, Rall BC (2011) Warming up the system: higher predator feeding  
583 rates but lower energetic efficiencies. *Global Change Biology*, **17**, 1301–1310
- 584 Rall BC, Brose U, Hartvig M, Kalinkat G, Schwarzmuller F, Vucic-Pestic O, Petchey OL  
585 (2012) Universal temperature and body-mass scaling of feeding rates. *Philosophical*  
586 *Transactions of the Royal Society B: Biological Sciences*, **367**, 2923–2934.
- 587 Rall BC, Vucic-Pestic O, Ehnes RB, Emmerson M, Brose U (2009) Temperature, predator-  
588 prey interaction strength and population stability. *Global Change Biology*, **16**, 2145–  
589 2157.
- 590 Ricciardi A, Bourget E (1998) Weight-to-weight conversion factors for marine benthic  
591 macroinvertebrates. *Marine Ecology Progress Series*, **171**, 245–251.
- 592 Richter-Boix A, Teplitsky C, Rogell B, Laurila A (2010) Local selection modifies phenotypic  
593 divergence among *Rana temporaria* populations in the presence of gene flow. *Molecular*  
594 *Ecology*, **19**, 716–731.
- 595 Sanford E (1999) Regulation of keystone predation by small changes in ocean temperature.  
596 *Science*, **283**, 2095–2097.
- 597 Schoolfield RM, Sharpe PJH, Magnuson CE (1981) Non-linear regression of biological  
598 temperature-dependent rate models based on absolute reaction-rate theory. *Journal of*  
599 *Theoretical Biology*, **88**, 719–731.
- 600 Sentis A, Morisson J, Boukal DS (2015) Thermal acclimation modulates the impacts of  
601 temperature and enrichment on trophic interaction strengths and population dynamics.  
602 *Global Change Biology*, **21**, 3290–3298.
- 603 Sharpe PJ, DeMichele DW (1977) Reaction kinetics of poikilotherm development. *Journal of*  
604 *Theoretical Biology*, **64**, 649–670.
- 605 Shurin JB, Clasen JL, Greig HS, Kratina P, Thompson PL (2012) Warming shifts top-down  
606 and bottom-up control of pond food web structure and function. *Philosophical*  
607 *Transactions of the Royal Society B: Biological Sciences*, **367**, 3008–3017.
- 608 Skalski GT, Gilliam JF (2001) Functional Responses With Predator Interference: Viable  
609 Alternatives To The Holling Type II Model . *Ecology*, **82**, 3083.

- 610 Urban MC (2013) Evolution mediates the effects of apex predation on aquatic food webs.  
611 *Proceedings of the Royal Society B: Biological Sciences*, **280**, 20130859–20130869.
- 612 Van M Savage, Gillooly JF, Brown JH, West GB, Charnov EL (2015) Effects of Body Size  
613 and Temperature on Population Growth. *The American Naturalist*, **163**, 429–441.
- 614 Vasseur DA, McCann KS (2005) A mechanistic approach for modeling temperature-  
615 dependent consumer-resource dynamics. *The American Naturalist*, **166**, 184–198.
- 616 West DC, Post DM (2016) Impacts of warming revealed by linking resource growth rates  
617 with consumer functional responses (ed Behmer S). *Journal of Animal Ecology*, **85**, 671–  
618 680.
- 619 Yvon-Durocher G, Allen AP, Cellamare M et al. (2015) Five Years of Experimental  
620 Warming Increases the Biodiversity and Productivity of Phytoplankton (ed Levin SA).  
621 *PLoS Biology*, **13**, e1002324–22.
- 622
- 623



624 **Tables**

625 **Table 1. Physical and chemical characteristics of the streams.** Temperature data were  
626 collected over a 3-day period. All other parameters were collected on the first day of the day  
627 of the experiment. Temperature data are displayed as means  $\pm$  1SD. All other data were  
628 originally collected for correlation with temperature across the catchment area (all 11  
629 streams), so that replication was on the level of stream identity.  
630

| <b>Parameter</b>                                            | <b>Stream 5</b> | <b>Stream 11</b> |
|-------------------------------------------------------------|-----------------|------------------|
| <b>Average temperature (<math>^{\circ}</math>C, 5 days)</b> | 17.5 $\pm$ 4.5  | 28.3 $\pm$ 1.3   |
| <b>pH</b>                                                   | 7.63            | 7.17             |
| <b>Conductivity</b>                                         | 273.6           | 235.7            |
| <b>NO<sub>2</sub></b>                                       | 0.22            | 0.24             |
| <b>NO<sub>3</sub></b>                                       | 0.57            | 0.29             |
| <b>NH<sub>4</sub></b>                                       | 0.17            | 0.19             |
| <b>PO<sub>4</sub></b>                                       | 0.27            | 0.35             |

631

632

633

634 **Table 2. Parameter estimates and output from the best fitting gnls model to the thermal**  
 635 **response curves of respiration rates.** Differences in treatments are given in **bold**. Parameter  
 636 estimates are taken from the averaged generalised linear models along with their standard  
 637 errors ( $\pm 1$  s.e.m). C = cold stream. W = warm stream. See Supporting Information for details  
 638 on model selection and information on AICsc scores for all possible models. Here, the model  
 639 average of the conditional average output for the four best models (within 2 AICc units of  
 640 each other) is displayed.  
 641

| <b>Non-linear mixed model output for respiration rates (R)</b> |                          |                |
|----------------------------------------------------------------|--------------------------|----------------|
| Treatment effect on                                            | Estimate                 | $\pm 1$ s.e.m. |
| $E_a$                                                          | C: 0.96                  | 0.05           |
| $\ln R(T_c)$                                                   | <b>C: 1.77</b>           | <b>0.15</b>    |
|                                                                | <b>W: 2.04</b>           | <b>0.12</b>    |
| $E_h$                                                          | <b>C: 5.01</b>           | <b>0.97</b>    |
|                                                                | <b>W: 3.16</b>           | <b>0.96</b>    |
| $T_h$ [K]<br>(°C)                                              | <b>C: 307.16 (34.01)</b> | <b>0.94</b>    |
|                                                                | <b>W: 314.15</b>         | <b>1.69</b>    |
|                                                                | <b>(41.00)</b>           | <b>0.78</b>    |
| $\alpha$                                                       | 0.36                     | 0.03           |



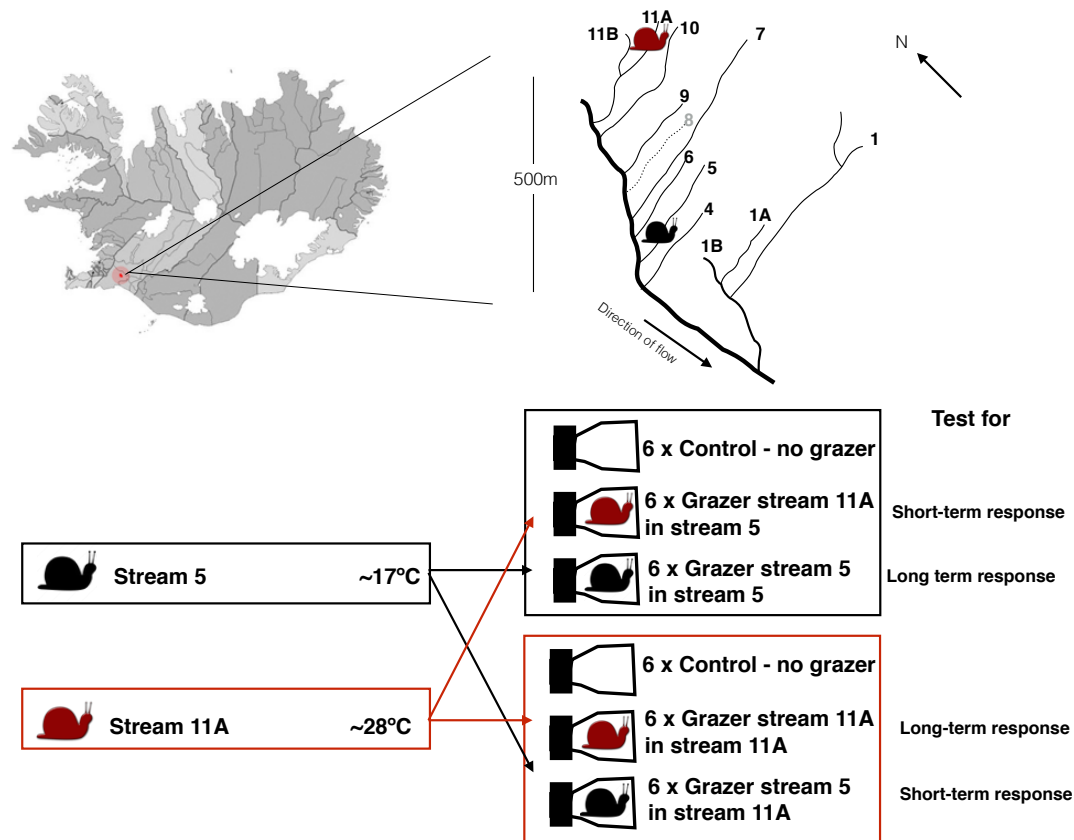

642

643 **FIGURE 1 Map and experimental set-up.** Top panel: The catchment area, with streams used in this experiment indicated by black (for the  
 644 colder stream 5 with  $17.5\text{ }^{\circ}\text{C} \pm 4.5\text{ }^{\circ}\text{C}$ ) and red (for the warmer stream 11A with  $28.3\text{ }^{\circ}\text{C} \pm 1.3\text{ }^{\circ}\text{C}$ ) snail icons. Lower panel: Schematic  
 645 overview of experimental set-up for the grazing experiment.

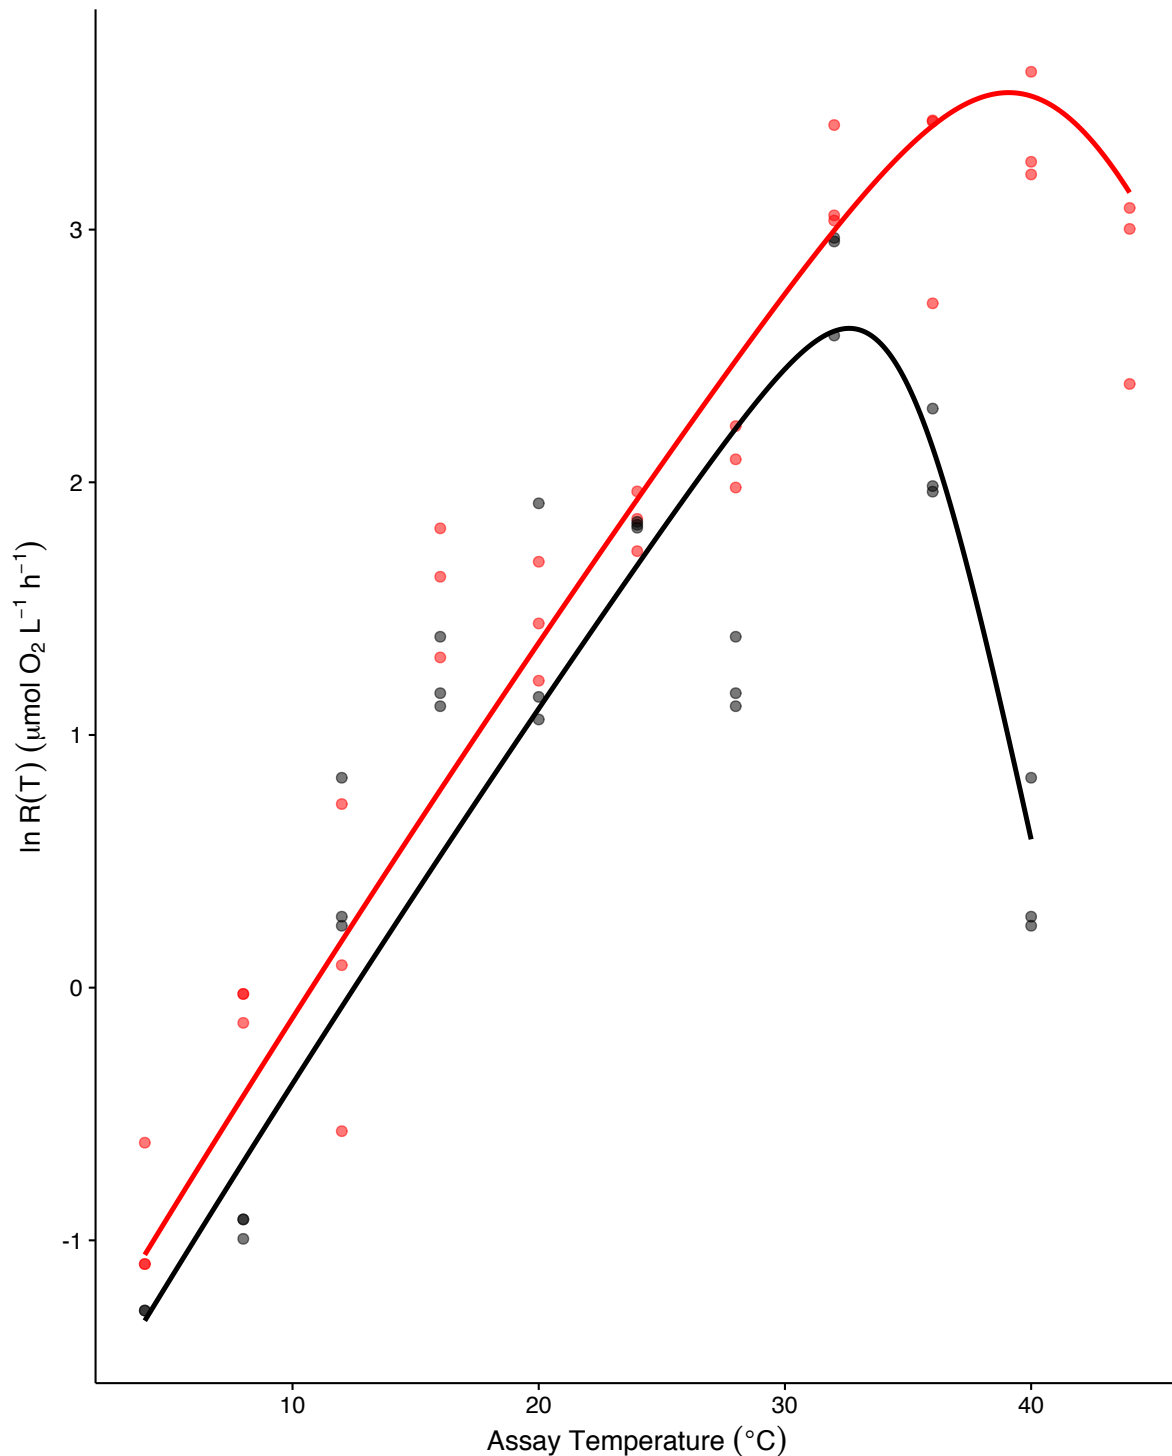

646  
647  
648  
649  
650  
651  
652  
653  
654  
655

**FIGURE 2 Thermal response curves for respiration.** Thermal response curves of respiration rates in  $\mu\text{mol O}_2 \text{ L}^{-1} \text{ h}^{-1}$  as a function of increasing temperature for populations of the snail *Radix balthica* from the cold (black) and warm (red) stream. Lines are derived from fitting a modified Sharpe-Schoolfield equation (see methods) to the rate data. Snails from the warm stream have higher temperature normalised metabolic rates ( $\ln R(T_c)$ , with  $T_c=18^\circ\text{C}$ ) at all measurement temperatures and have higher optimal temperatures ( $T_{\text{opt}}$ ), than snails from the cold stream. The inactivation energy ( $E_h$ ) is lower in snails from the warm stream, resulting in a curve that is both broader and elevated in comparison to the thermal response curve of respiration for snails from the cold stream.

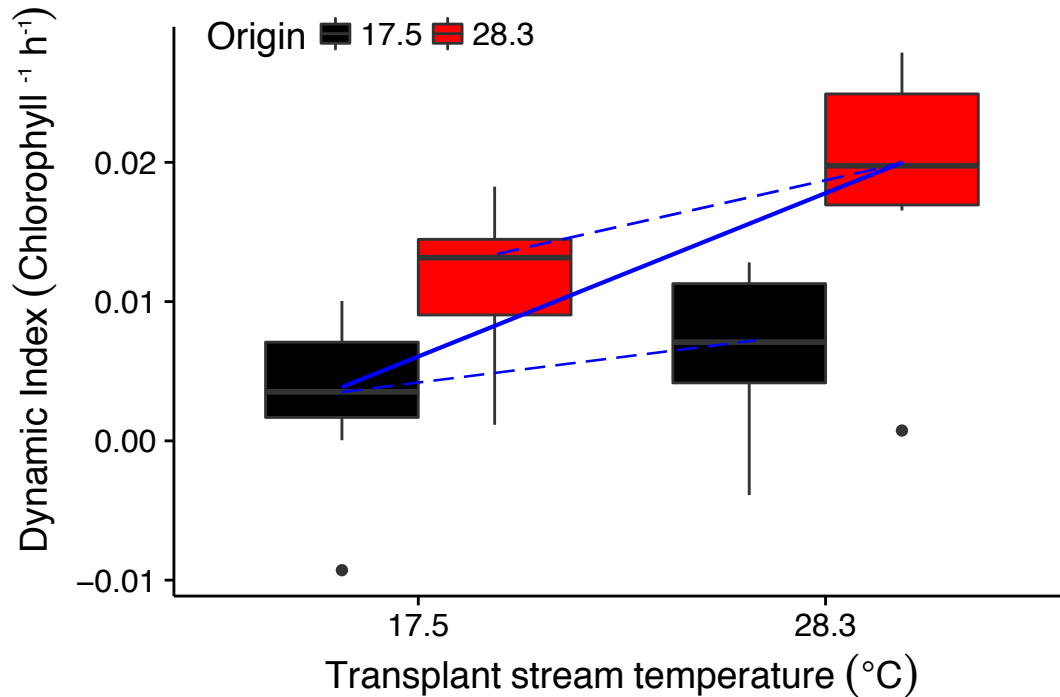

656

657 **FIGURE 3 Long-term and short-term effects of stream temperature on interaction strength** Long-term  
658 and short-term effects of temperature in interaction strength measured via the dynamic index in units of  
659 chlorophyll consumed per hour. Populations originating from the warm stream have stronger interaction  
660 strength indices in all environments and the highest dynamic index overall was found for snails from the warm  
661 stream in their original environment. Interaction strength increased with temperature both in the short-term  
662 ( $E_{short}$ , dashed blue lines) and in the long-term ( $E_{long}$ , solid blue line), with  $E_{long}$  significantly greater than  $E_{short}$ .  
663

664

665

## Supporting Information

666

667

for

668

669

**Temperature-driven selection on metabolic traits increases the**

670

**strength of an algal-grazer interaction in naturally warmed**

671

**streams**

672

### Authors

673

C. -Elisa Schaum<sup>1\*</sup>, Richard ffrench-Constant<sup>2</sup>, Chris Lowe<sup>1,2</sup>, Jón S. Ólafsson<sup>3</sup>, Daniel

674

Padfield<sup>1</sup> & Gabriel Yvon-Durocher<sup>1\*</sup>

675

676

### Author affiliations

677

1 Environment and Sustainability Institute, University of Exeter, Penryn, Cornwall TR10 9EZ, UK

678

2 Centre for Ecology and Conservation, College of Life and Environmental Sciences, University of Exeter,

679

Penryn, Cornwall, TR10 9FE, U.K.

680

3. Marine and Freshwater Research Institute, Árleyni 22, 112 Reykjavik, Iceland.

681

682

683

\* Corresponding authors: [g.yvon-durocher@exeter.ac.uk](mailto:g.yvon-durocher@exeter.ac.uk), [bav0352@uni-hamburg.de](mailto:bav0352@uni-hamburg.de)

684

### List of SI Items:

685

**SI Figure 1: The catchment area and experimental set-up.**

686

**SI Figure 2: Chlorophyll content in control microcosms.**

687

**SI Figure 3: Snail weight for 205 randomly selected snails from each stream**

688

**SI Figure 4: Grazer density (snails/m<sup>2</sup>) in stream 5 (17.5°C) and stream 11 (28.3°C)**

689

690

**SI Table 1: AICc comparison details for model simplification of the gnls models fitted to**

691

**the thermal response data for respiration rates.**

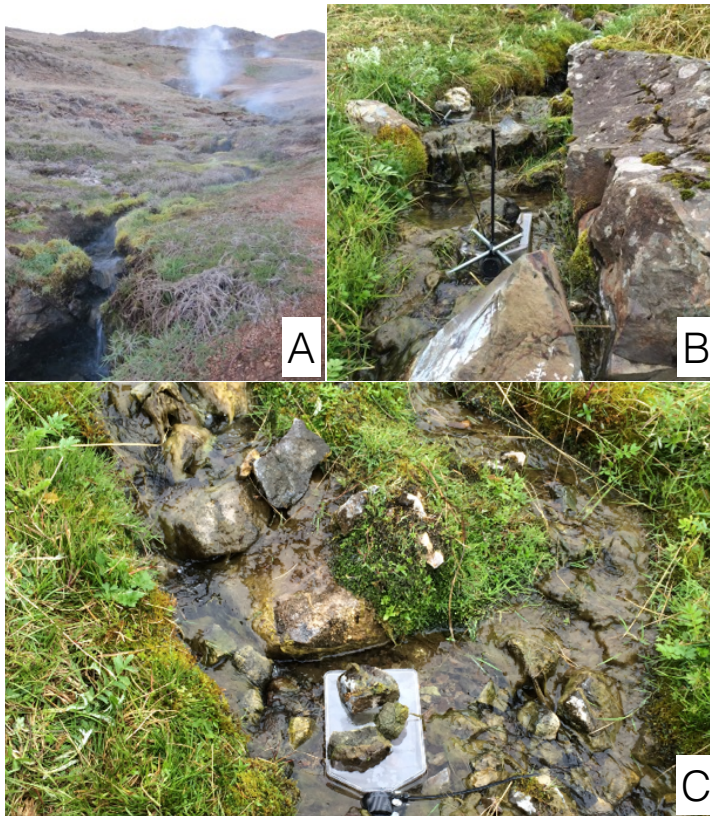

692  
693  
694  
695  
696  
697

**Figure S1: the catchment area and experimental set-up.** A: View of representative stream in the Hveragerði catchment area. B and C: Microcosms fixed in stream 5 (Microcosm pictures courtesy of B. Flello).

698

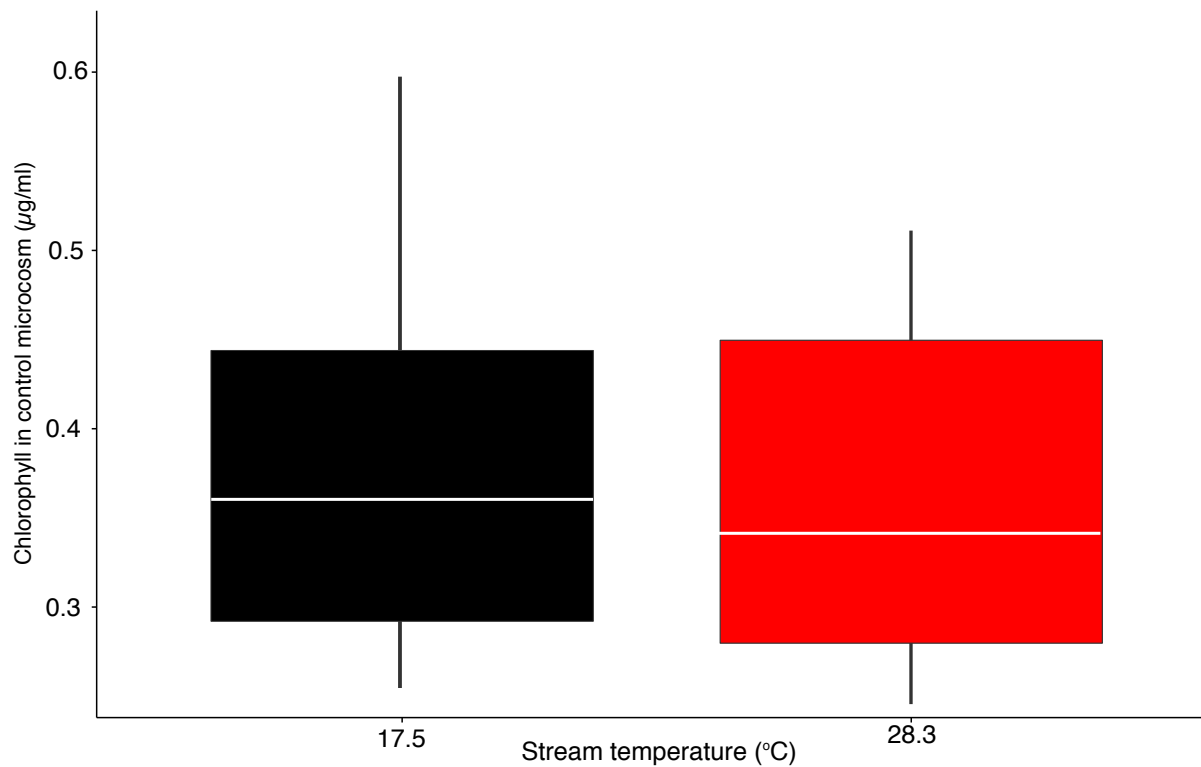

699

700

701

702 **Figure S2: Chlorophyll content in control microcosms.** Chlorophyll content at the end of  
703 the experiment in control microcosms did not differ significantly between cold and warm  
704 streams (one-way ANOVA  $F_{1,10}=1.28$ ,  $p=0.26$ ) implying growth and mortality of the biofilms  
705 was consistent in both treatments.

706

707  
708

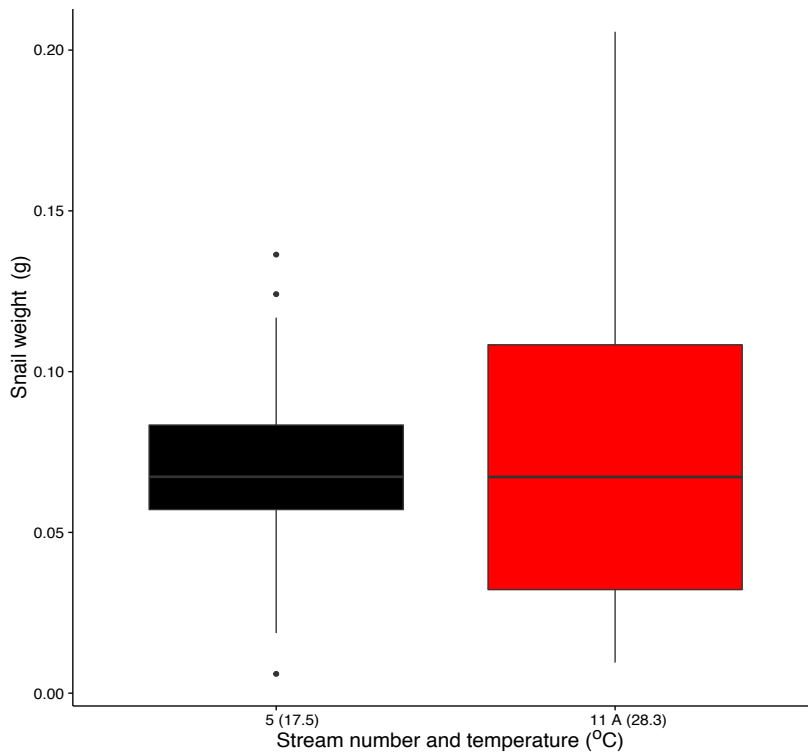

709  
710  
711  
712  
713

**Figure S3: Snail weight for 205 randomly selected snails from each stream. Snail wet weight did not vary significantly between the cold (black) and warm (red) streams (one-way ANOVA:  $F_{1,408} = 0.15$ ,  $p = 0.7$ ).**

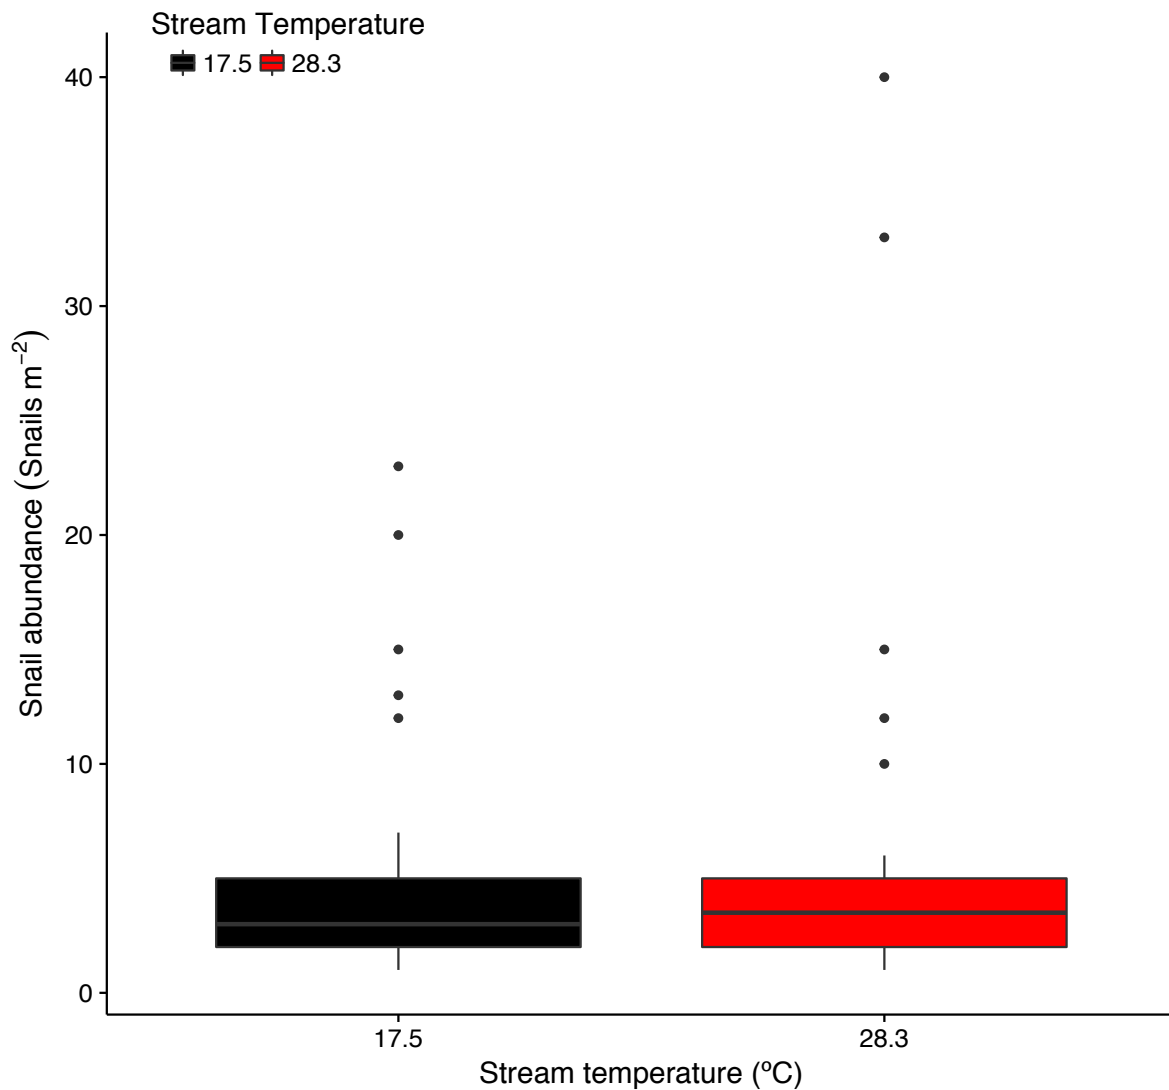

714  
715  
716  
717  
718  
719  
720

**Figure S4: *In-situ* grazer density in the experimental streams.** Snails were counted in 34 randomly distributed 1m<sup>2</sup> quadrats. There was no significant difference in snail abundance between streams (one-way ANOVA:  $F_{1,66}$ ,  $p = 0.54$ ). The mean abundance of 5.5 individuals per square meter was comparable to the densities established in the experimental microcosms. Snails used for the experiments were sampled randomly from these patches.



721  
722  
723  
724  
725  
726  
727  
728  
729  
730

**Table S1. AICc comparison details for model simplification of the gnls models fitted to the thermal response data for respiration rates.**

Equation 1 was used to account for effects of mass (alpha in the model) on metabolic rate, and fitted to data for respiration ( $\ln R$ ) to characterize acute thermal responses. Model selection was carried out by first fitting the most complex model to the data and then calculating AICc scores for all possible models with all possible treatment effects, and comparing the models through the aictab function within the AICmodav package (version 2.1-0) in R. The most parsimonious model included differences between warm and cold populations in  $\ln R(T_c)$ ,  $T_h$ , and  $E_h$ , while  $E_a$  and  $\alpha$  were consistent between populations. For the four models with a difference in AICc of less than two, models were averaged using the modelavg function in the same package. **Lower part of table: Model averaged parameter estimates, with 95% confidence intervals (95%CI) and relative importance as sum of AICc based relative weights (SW), for models where  $\Delta AICc < 2$ .**

| Model name | Model details                               | K  | AICc  | Dellta AICC | AICc weights | cumulative weights | LogLik |
|------------|---------------------------------------------|----|-------|-------------|--------------|--------------------|--------|
| r.gnls19   | alpha+Ea+Eh~ 1, ln.b0+Th~1 + StreamT        | 8  | 84.98 | 0           | 0.26         | 0.26               | -33.13 |
| r.gnls7    | ln.b0 +Ea~ 1, alpha+ Eh + Th ~ 1 + StreamT  | 9  | 86.15 | 1.17        | 0.14         | 0.4                | -32.34 |
| r.gnls10   | Ea +alpha~ 1,ln.b0+ Eh + Th ~ 1 + StreamT   | 9  | 86.37 | 1.39        | 0.13         | 0.53               | -32.45 |
| r.gnls22   | ln.b0+alpha+Ea+Eh~ 1, Th~1 + StreamT        | 7  | 86.51 | 1.53        | 0.12         | 0.65               | -35.22 |
| r.gnls13   | alpha+Eh~ 1,ln.b0+ Ea+ Th ~ 1 + StreamT     | 9  | 87.68 | 2.7         | 0.07         | 0.72               | -33.11 |
| r.gnls9    | alpha+ Ea + Eh ~ 1 + StreamT,ln.b0 +Th~ 1   | 9  | 88.24 | 3.26        | 0.05         | 0.77               | -33.39 |
| r.gnls16   | ln.b0+alpha+Ea~ 1,Eh+Th~ 1 + StreamT        | 8  | 88.81 | 3.83        | 0.04         | 0.8                | -35.05 |
| r.gnls1    | Ea ~ 1, ln.b0+alpha + Eh + Th ~ 1 + StreamT | 10 | 88.97 | 3.99        | 0.04         | 0.84               | -32.33 |
| r.gnls2    | ln.b0 ~ 1, alpha +Ea+ Eh + Th ~ 1 + StreamT | 10 | 89.01 | 4.03        | 0.03         | 0.87               | -32.35 |
| r.gnls17   | ln.b0+alpha+Eh~ 1,Ea+Th~ 1 + StreamT        | 8  | 89.12 | 4.14        | 0.03         | 0.91               | -35.2  |
| r.gnls3    | alpha ~ 1, ln.b0+Ea+ Eh + Th ~ 1 + StreamT  | 10 | 89.21 | 4.23        | 0.03         | 0.94               | -32.45 |
| r.gnls4    | Eh ~ 1, ln.b0+alpha+Ea + Th ~ 1 + StreamT   | 10 | 90.02 | 5.04        | 0.02         | 0.96               | -32.85 |
| r.gnls5    | ln.b0+alpha+Ea+Eh ~ 1 + StreamT,Th ~ 1      | 10 | 91.04 | 6.06        | 0.01         | 0.97               | -33.36 |
| r.gnls12   | ln.b0+ alpha+ Eh ~ 1 + StreamT,Ea +Th~ 1    | 9  | 91.24 | 6.25        | 0.01         | 0.98               | -34.89 |
| r.gnls6    | ln.b0 +alpha~ 1, Ea+ Eh + Th ~ 1 + StreamT  | 9  | 91.6  | 6.61        | 0.01         | 0.99               | -35.07 |
| r.gnls     | Ful model                                   | 11 | 91.97 | 6.99        | 0.01         | 1                  | -32.34 |
| r.gnls23   | Eh~1 + StreamT,ln.b0+alpha+Ea+Th~ 1         | 7  | 99.12 | 14.14       | 0            | 1                  | -41.52 |

|          |                                                               |                |        |       |   |   |        |
|----------|---------------------------------------------------------------|----------------|--------|-------|---|---|--------|
| r.gnls18 | $Ea+Eh \sim 1 + \text{StreamT}, \ln.b0+\alpha+Th \sim 1$      | 8              | 102.36 | 17.38 | 0 | 1 | -41.82 |
| r.gnls20 | $\ln.b0+Ea \sim 1 + \text{StreamT}, \alpha+Eh+Th \sim 1$      | 8              | 105.68 | 20.69 | 0 | 1 | -43.48 |
| r.gnls8  | $\ln.b0 + Eh \sim 1, \alpha+ Ea + Th \sim 1 + \text{StreamT}$ | 9              | 106.1  | 21.12 | 0 | 1 | -42.32 |
| r.gnls15 | $\ln.b0+ \alpha+Ea \sim 1 + \text{StreamT}, Eh+Th \sim 1$     | 9              | 107.84 | 22.86 | 0 | 1 | -43.19 |
| r.gnls26 | $Ea \sim 1 + \text{StreamT}, \ln.b0+\alpha+Eh+Th \sim 1$      | 7              | 113.1  | 28.12 | 0 | 1 | -48.51 |
| r.gnls25 | $\alpha \sim 1 + \text{StreamT}, \ln.b0+Ea+Eh+Th \sim 1$      | 7              | 115.95 | 30.97 | 0 | 1 | -49.94 |
| r.gnls24 | $\ln.b0 \sim 1 + \text{StreamT}, \alpha+Ea+Eh+Th \sim 1$      | 7              | 116.79 | 31.81 | 0 | 1 | -50.36 |
| r.gnls21 | $\ln.b0+\alpha \sim 1 + \text{StreamT}, Ea+Eh+Th \sim 1$      | 8              | 118.31 | 33.33 | 0 | 1 | -49.8  |
| r.gnls27 | $\ln.b0+\alpha+Ea+Eh+Th \sim 1$                               | 6              | 131.06 | 46.08 | 0 | 1 | -58.77 |
| r.gnls11 | $Ea + Eh \sim 1, \ln.b0+ \alpha+ Th \sim 1 + \text{StreamT}$  | no convergence |        |       |   |   |        |
| r.gnls14 | $\ln.b0+ Ea+ Eh \sim 1 + \text{StreamT}, \alpha+Th \sim 1$    | no convergence |        |       |   |   |        |

731

**For AICc <2 (bold in upper part of table)**

| Parameter                      | <b>lnR(Tc)</b> |             | <b>Alpha</b>        | <b>Ea</b>           | <b>Eh</b>   |             | <b>Th [K]</b>   |                 |
|--------------------------------|----------------|-------------|---------------------|---------------------|-------------|-------------|-----------------|-----------------|
| <b>Stream temperature (°C)</b> | 17.5           | 28.3        | No treatment effect | No treatment effect | 17.5        | 28.3        | 17.5            | 28.3            |
| <b>SW (sum of weights)</b>     | 0.6            |             | 0.22                | 0                   | 0.42        |             | 1.00            |                 |
| <b>Parameter Estimate</b>      | 1.77           | 2.04        | 0.36                | 0.96                | 5.01        | 3.16        | 307.16          | 314.15          |
| <b>95% CI [lower,upper]</b>    | [0.98-2.77]    | [1.09-3.28] | [0.34-0.76]         | [0.85-1.07]         | [3.07-6.96] | [2.96-5.11] | [305.74-309.99] | [309.04-319.13] |

732

733
